# Supplementary material for: The Stability of Sugar Yield in Promising Sugarcane Genotypes (Saccharum officinarum L.)
Source: Hindawi journal article supplement (doi:10.1155/2024/5540112), 2024-01-18
Supplement: f1 [file 5540112.f1.zip]

Archive with 5 entries (5 files):
- S1.xlsx
- S2.xlsx
- S3.xlsx
- S4.xlsx
- S5.xlsx
