# Supplementary material for: The Stability of Sugar Yield in Promising Sugarcane Genotypes (Saccharum officinarum L.)
Source: Hindawi journal article supplement (doi:10.1155/2024/5540112), 2024-01-18
Supplement: f1 [file 5540112.f1.zip › S1.xlsx]

## Sheet: total
treat	dfe	sse	mse
sy	54	53.6158	0.992884
	58	41.8348	0.72129
	54	17.95	0.332407
	58	73.9309	1.27467
	58	23.666	0.408035
	58	43.6359	0.752343
	57	47.4951	0.833247
	54	62.7596	1.16222
	56	75.0497	1.34017

## Sheet: bartelet sy
X2		1/C	C	1/3(K-1)	1/FI	1/FT		lnS2Et	S2Et	df*lnS2Ei	lnS2Ei	S2Ei	SSEi	1/fi	fi	منطقه	سال
7.94852	8.00083	0.993462	1.00658	0.0416667	0.159922	0.00197239	98.763	0.194799	1.21507	21.1759	0.392146	1.48015	79.9283	0.0185185	54	1	1
										14.0759	0.242688	1.27467	73.9309	0.0172414	58	2	1
										-10.3982	-0.182425	0.833247	47.4951	0.0175439	57	3	1
										13.9219	0.240032	1.27129	73.7348	0.0172414	58	1	2
										13.8938	0.239548	1.27067	73.6991	0.0172414	58	2	2
										14.4603	0.267784	1.30706	70.5815	0.0185185	54	3	2
										-7.12293	-0.131906	0.876423	47.3269	0.0185185	54	1	3
										14.3587	0.247565	1.2809	74.2923	0.0172414	58	2	3
										16.3967	0.292799	1.34017	75.0497	0.0178571	56	3	3
										90.7621			616.039	0.159922	507	sum
