# Supplementary material for: The Stability of Sugar Yield in Promising Sugarcane Genotypes (Saccharum officinarum L.)
Source: Hindawi journal article supplement (doi:10.1155/2024/5540112), 2024-01-18
Supplement: f1 [file 5540112.f1.zip › S2.xlsx]

## Sheet: Sheet1
NO	treat	year	loc	rep	sy
1	4/1	1	1	1	10.0744
2	3/87	1	1	1	9.56917
3	1/113	1	1	1	7.53316
4	3/62	1	1	1	8.30655
5	8/12	1	1	1	8.94673
6	1/66	1	1	1	8.22312
7	6/8	1	1	1	9.14897
8	4/5	1	1	1	9.45077
9	CP57-614	1	1	1	8.36116
10	4/6	1	1	1	10.4876
11	3/101	1	1	1	8.15686
12	6/60	1	1	1	8.87814
13	8/10	1	1	1	9.50782
14	1/90	1	1	1	9.95701
15	1/9	1	1	1	8.22324
16	6/33	1	1	1	9.11233
17	CP69-1062	1	1	1	8.31865
18	6/39	1	1	1	12.0475
19	1/26	1	1	1	8.11649
20	CP48-103	1	1	1	7.64858
21	NCO310	1	1	1	8.86119
22	7/12	1	1	1	8.76931
23	6/12	1	1	1	9.30547
24	8/29	1	1	1	8.39691
25	6/31	1	1	1	11.2366
26	6/26	1	1	1	8.71129
27	8/23	1	1	1	8.89475
28	3/3	1	1	1	9.12872
29	1/93	1	1	1	10.8569
30	6/28	1	1	1	7.78368
31	6/60	1	1	2	8.21037
32	1/93	1	1	2	10.9068
33	6/28	1	1	2	7.86065
34	7/12	1	1	2	9.67128
35	8/23	1	1	2	8.60004
36	6/8	1	1	2	8.40933
37	6/33	1	1	2	9.30443
38	1/9	1	1	2	7.76549
39	1/26	1	1	2	7.91866
40	8/12	1	1	2	8.0757
41	3/3	1	1	2	9.42609
42	6/39	1	1	2	9.53484
43	CP69-1062	1	1	2	8.33811
44	3/62	1	1	2	10.0232
45	1/113	1	1	2	7.38808
46	4/5	1	1	2	8.54486
47	NCO310	1	1	2	7.9179
48	6/26	1	1	2	10.5627
49	4/6	1	1	2	8.59958
50	6/12	1	1	2	8.49752
51	3/101	1	1	2	7.44777
52	4/1	1	1	2	8.79487
53	3/87	1	1	2	9.72953
54	1/90	1	1	2	8.85235
55	8/10	1	1	2	10.0841
56	CP48-103	1	1	2	8.578
57	8/29	1	1	2	10.0467
58	CP57-614	1	1	2	10.2712
59	1/66	1	1	2	9.76102
60	6/31	1	1	2	9.28838
61	CP69-1062	1	1	3	9.49162
62	8/23	1	1	3	7.77551
63	6/26	1	1	3	11.6017
64	6/12	1	1	3	8.49955
65	1/113	1	1	3	8.66246
66	3/101	1	1	3	12.2445
67	CP57-614	1	1	3	10.1857
68	8/12	1	1	3	7.53
69	7/12	1	1	3	8.42431
70	3/62	1	1	3	10.414
71	6/31	1	1	3	9.05074
72	6/28	1	1	3	8.93742
73	4/6	1	1	3	10.4237
74	6/60	1	1	3	7.92804
75	4/1	1	1	3	11.5153
76	3/87	1	1	3	6.17354
77	6/8	1	1	3	12.528
78	1/66	1	1	3	8.59421
79	4/5	1	1	3	9.85817
80	8/29	1	1	3	9.42586
81	3/3	1	1	3	9.64712
82	1/93	1	1	3	8.06432
83	NCO310	1	1	3	10.672
84	6/33	1	1	3	9.84299
85	6/39	1	1	3	10.0406
86	8/10	1	1	3	9.70654
87	1/90	1	1	3	9.44509
88	CP48-103	1	1	3	9.39313
89	1/9	1	1	3	9.63199
90	1/26	1	1	3	9.7489
91	4/1	1	2	1	9.88008
92	3/87	1	2	1	9.59316
93	1/113	1	2	1	9.66075
94	3/62	1	2	1	7.4981
95	8/12	1	2	1	7.53961
96	1/66	1	2	1	10.1159
97	6/8	1	2	1	11.1422
98	4/5	1	2	1	8.83282
99	CP57-614	1	2	1	9.30592
100	4/6	1	2	1	6.64177
101	3/101	1	2	1	9.78806
102	6/60	1	2	1	9.19259
103	8/10	1	2	1	7.54224
104	1/90	1	2	1	6.95229
105	1/9	1	2	1	7.49725
106	CP69-1062	1	2	2	8.2388
107	6/39	1	2	1	8.00045
108	1/26	1	2	1	8.61575
109	CP48-103	1	2	1	8.09965
110	NCO310	1	2	1	8.26288
111	7/12	1	2	1	9.80296
112	6/12	1	2	1	9.79058
113	8/29	1	2	1	8.21206
114	6/31	1	2	1	8.75969
115	6/26	1	2	1	6.60942
116	8/23	1	2	1	9.94049
117	3/3	1	2	1	6.32505
118	1/93	1	2	1	6.49818
119	6/28	1	2	1	8.29333
120	6/39	1	2	1	6.13583
121	6/33	1	2	1	9.85288
122	1/93	1	2	2	9.76141
123	8/29	1	2	2	8.9013
124	6/31	1	2	2	9.05643
125	6/60	1	2	2	9.16576
126	6/8	1	2	2	10.3106
127	3/101	1	2	2	9.31429
128	1/9	1	2	2	7.90258
129	1/26	1	2	2	9.20164
130	6/28	1	2	2	8.00378
131	3/3	1	2	2	7.03392
132	4/5	1	2	2	7.02891
133	CP69-1062	1	2	2	9.87909
134	3/62	1	2	2	6.70507
135	1/113	1	2	2	8.22073
136	8/12	1	2	2	9.20869
137	NCO310	1	2	2	8.29597
138	6/26	1	2	2	9.15713
139	8/10	1	2	2	8.54272
140	6/12	1	2	2	9.66399
141	8/23	1	2	2	9.41148
142	4/1	1	2	2	7.79749
143	3/87	1	2	2	7.82815
144	1/90	1	2	2	6.9876
145	4/6	1	2	2	6.64222
146	CP48-103	1	2	2	6.79092
147	7/12	1	2	2	7.37969
148	CP57-614	1	2	2	6.61061
149	1/66	1	2	2	6.12579
150	6/33	1	2	2	6.16427
151	CP69-1062	1	2	3	5.7204
152	8/23	1	2	3	6.89996
153	6/26	1	2	3	8.82531
154	6/12	1	2	3	8.90706
155	1/113	1	2	3	7.19159
156	3/101	1	2	3	7.98817
157	CP57-614	1	2	3	6.82107
158	8/12	1	2	3	7.0667
159	7/12	1	2	3	7.59214
160	3/62	1	2	3	6.20136
161	6/31	1	2	3	7.19125
162	6/28	1	2	3	7.04805
163	4/6	1	2	3	7.9496
164	6/60	1	2	3	6.88856
165	4/1	1	2	3	8.21156
166	3/87	1	2	3	6.38933
167	6/8	1	2	3	6.52214
168	1/66	1	2	3	6.67822
169	4/5	1	2	3	8.64871
170	8/29	1	2	3	6.64981
171	3/3	1	2	3	7.98551
172	1/93	1	2	3	7.06379
173	NCO310	1	2	3	7.14448
174	6/33	1	2	3	7.83118
175	6/39	1	2	3	7.17937
176	8/10	1	2	3	6.99802
177	1/90	1	2	3	7.58392
178	CP48-103	1	2	3	7.47759
179	1/9	1	2	3	7.0115
180	1/26	1	2	3	8.87871
181	3/87	1	3	1	9.78255
182	6/8	1	3	1	8.5088
183	1/66	1	3	1	8.35276
184	4/5	1	3	1	6.77777
185	8/29	1	3	1	6.97082
186	3/3	1	3	1	9.74102
187	1/93	1	3	1	11.6744
188	NCO310	1	3	1	7.47897
189	6/33	1	3	1	6.72013
190	8/23	1	3	1	6.35222
191	6/31	1	3	1	8.93816
192	6/28	1	3	1	7.59128
193	4/6	1	3	1	8.17173
194	6/60	1	3	1	8.84955
195	4/1	1	3	1	6.97979
196	8/10	1	3	1	9.48332
197	1/90	1	3	1	10.6907
198	6/39	1	3	1	7.9329
199	1/9	1	3	1	7.0072
200	1/26	1	3	1	6.72811
201	CP69-1062	1	3	1	9.14651
202	CP48-103	1	3	1	8.49915
203	6/26	1	3	1	7.35161
204	6/12	1	3	1	10.0765
205	1/113	1	3	1	7.8035
206	3/101	1	3	1	11.1741
207	CP57-614	1	3	1	10.0879
208	8/12	1	3	1	8.43996
209	7/12	1	3	1	10.3948
210	3/62	1	3	1	7.0893
211	8/12	1	3	2	8.09297
212	NCO310	1	3	2	6.70968
213	6/26	1	3	2	8.81862
214	8/10	1	3	2	7.19921
215	6/12	1	3	2	9.81539
216	8/23	1	3	2	6.9706
217	4/1	1	3	2	6.77656
218	3/87	1	3	2	9.82701
219	1/90	1	3	2	7.40712
220	4/6	1	3	2	8.6796
221	3/3	1	3	2	9.81954
222	4/5	1	3	2	7.33058
223	1/93	1	3	2	9.54991
224	3/62	1	3	2	7.87494
225	1/113	1	3	2	7.85575
226	CP48-103	1	3	2	6.9253
227	7/12	1	3	2	8.54643
228	CP57-614	1	3	2	9.70739
229	1/66	1	3	2	7.99268
230	1/26	1	3	2	6.73465
231	6/39	1	3	2	9.82025
232	CP69-1062	1	3	2	9.62875
233	6/33	1	3	2	7.25831
234	6/31	1	3	2	8.89418
235	6/60	1	3	2	7.59914
236	6/8	1	3	2	9.50939
237	3/101	1	3	2	7.8868
238	1/9	1	3	2	7.61183
239	8/29	1	3	2	7.70892
240	6/28	1	3	2	7.77003
241	NCO310	1	3	3	7.74723
242	7/12	1	3	3	9.67072
243	6/12	1	3	3	8.47504
244	8/29	1	3	3	9.29407
245	6/31	1	3	3	9.5628
246	6/26	1	3	3	9.436
247	8/23	1	3	3	7.31764
248	3/3	1	3	3	8.78487
249	1/93	1	3	3	9.92413
250	6/28	1	3	3	9.21564
251	3/101	1	3	3	8.04354
252	6/60	1	3	3	9.46014
253	8/10	1	3	3	8.52417
254	1/90	1	3	3	8.30096
255	1/113	1	3	3	7.50856
256	6/33	1	3	3	7.57641
257	CP69-1062	1	3	3	9.65829
258	6/39	1	3	3	8.92319
259	1/26	1	3	3	8.61612
260	CP48-103	1	3	3	6.98044
261	4/1	1	3	3	8.3394
262	3/87	1	3	3	8.00083
263	1/9	1	3	3	7.75977
264	3/62	1	3	3	8.89995
265	8/12	1	3	3	7.91442
266	1/66	1	3	3	8.6467
267	6/8	1	3	3	7.88717
268	4/5	1	3	3	7.86588
269	CP57-614	1	3	3	7.87069
270	4/6	1	3	3	7.81575
271	4/1	2	1	1	6.42388
272	3/87	2	1	1	7.98649
273	1/113	2	1	1	7.06786
274	3/62	2	1	1	6.37708
275	8/12	2	1	1	9.47572
276	1/66	2	1	1	6.27927
277	6/8	2	1	1	7.75912
278	4/5	2	1	1	7.97877
279	CP57-614	2	1	1	9.08135
280	4/6	2	1	1	6.82666
281	3/101	2	1	1	9.51588
282	6/60	2	1	1	9.43343
283	8/10	2	1	1	7.41475
284	1/90	2	1	1	7.69824
285	1/9	2	1	1	6.39513
286	6/33	2	1	1	7.92923
287	CP69-1062	2	1	1	8.33629
288	6/39	2	1	1	7.20851
289	1/26	2	1	1	6.55355
290	CP48-103	2	1	1	7.15618
291	NCO310	2	1	1	7.91691
292	7/12	2	1	1	6.20576
293	6/12	2	1	1	7.72088
294	8/29	2	1	1	8.01521
295	6/31	2	1	1	7.256
296	6/26	2	1	1	8.24258
297	8/23	2	1	1	7.93554
298	3/3	2	1	1	6.78671
299	1/93	2	1	1	8.8861
300	6/28	2	1	1	7.31345
301	6/39	2	1	2	9.17521
302	1/93	2	1	2	7.61788
303	8/29	2	1	2	8.01239
304	6/31	2	1	2	7.69212
305	6/60	2	1	2	8.52521
306	6/8	2	1	2	8.84054
307	3/101	2	1	2	7.52048
308	1/9	2	1	2	6.96615
309	1/26	2	1	2	8.14648
310	6/28	2	1	2	8.15544
311	3/3	2	1	2	5.59487
312	4/5	2	1	2	8.67388
313	CP69-1062	2	1	2	8.45678
314	3/62	2	1	2	6.64623
315	1/113	2	1	2	6.93855
316	8/12	2	1	2	8.37764
317	NCO310	2	1	2	7.79612
318	6/26	2	1	2	9.58543
319	8/10	2	1	2	7.35541
320	6/12	2	1	2	9.01545
321	8/23	2	1	2	7.05944
322	4/1	2	1	2	7.2124
323	3/87	2	1	2	7.36593
324	1/90	2	1	2	7.22952
325	4/6	2	1	2	7.04627
326	CP48-103	2	1	2	6.55107
327	7/12	2	1	2	6.91481
328	CP57-614	2	1	2	8.86134
329	1/66	2	1	2	7.00887
330	6/33	2	1	2	9.20295
331	CP69-1062	2	1	3	9.74149
332	8/23	2	1	3	7.65117
333	6/26	2	1	3	9.10221
334	6/12	2	1	3	8.06747
335	1/113	2	1	3	9.21298
336	3/101	2	1	3	9.81333
337	CP57-614	2	1	3	10.6221
338	8/12	2	1	3	8.52597
339	7/12	2	1	3	9.46502
340	3/62	2	1	3	8.06648
341	6/31	2	1	3	8.41841
342	6/28	2	1	3	7.10569
343	4/6	2	1	3	7.04941
344	6/60	2	1	3	7.37223
345	4/1	2	1	3	6.80609
346	3/87	2	1	3	8.54371
347	6/8	2	1	3	10.6618
348	1/66	2	1	3	7.25891
349	4/5	2	1	3	6.61213
350	8/29	2	1	3	6.66199
351	3/3	2	1	3	6.92224
352	1/93	2	1	3	7.38381
353	NCO310	2	1	3	6.73095
354	6/33	2	1	3	7.74248
355	6/39	2	1	3	8.73556
356	8/10	2	1	3	7.57558
357	1/90	2	1	3	6.49843
358	CP48-103	2	1	3	7.47159
359	1/9	2	1	3	7.59172
360	1/26	2	1	3	9.3109
361	4/1	2	2	1	6.5302
362	3/87	2	2	1	7.43323
363	1/113	2	2	1	6.5509
364	3/62	2	2	1	6.20019
365	8/12	2	2	1	6.25987
366	1/66	2	2	1	5.46335
367	6/8	2	2	1	5.5446
368	4/5	2	2	1	4.95799
369	CP57-614	2	2	1	5.77857
370	4/6	2	2	1	5.13987
371	3/101	2	2	1	5.30505
372	6/60	2	2	1	7.38739
373	8/10	2	2	1	5.29423
374	1/90	2	2	1	5.92849
375	1/9	2	2	1	6.75433
376	6/33	2	2	1	5.56257
377	CP69-1062	2	2	1	4.88431
378	6/39	2	2	1	5.38177
379	1/26	2	2	1	5.58788
380	CP48-103	2	2	1	5.9361
381	NCO310	2	2	1	7.78592
382	7/12	2	2	1	6.47991
383	6/12	2	2	1	5.75789
384	8/29	2	2	1	5.03546
385	6/31	2	2	1	7.5426
386	6/26	2	2	1	5.31167
387	8/23	2	2	1	5.43699
388	3/3	2	2	1	5.15779
389	1/93	2	2	1	5.00702
390	6/28	2	2	1	5.07081
391	6/39	2	2	2	5.37714
392	1/93	2	2	2	6.79139
393	8/29	2	2	2	5.25244
394	6/31	2	2	2	5.19551
395	6/60	2	2	2	5.0726
396	6/8	2	2	2	5.30573
397	3/101	2	2	2	5.18931
398	1/9	2	2	2	5.10591
399	1/26	2	2	2	5.55836
400	6/28	2	2	2	4.88636
401	3/3	2	2	2	4.90332
402	4/5	2	2	2	4.93487
403	CP69-1062	2	2	2	6.26657
404	3/62	2	2	2	5.33725
405	1/113	2	2	2	5.47595
406	8/12	2	2	2	5.05869
407	NCO310	2	2	2	6.4253
408	6/26	2	2	2	5.56025
409	8/10	2	2	2	5.76108
410	6/12	2	2	2	5.39773
411	8/23	2	2	2	6.47529
412	4/1	2	2	2	6.13108
413	3/87	2	2	2	6.18232
414	1/90	2	2	2	5.44181
415	4/6	2	2	2	6.15183
416	CP48-103	2	2	2	5.16808
417	7/12	2	2	2	5.29431
418	CP57-614	2	2	2	4.96051
419	1/66	2	2	2	5.6014
420	6/33	2	2	2	4.87108
421	CP69-1062	2	2	3	6.19979
422	8/23	2	2	3	5.04832
423	6/26	2	2	3	4.84282
424	6/12	2	2	3	5.93141
425	1/113	2	2	3	5.93268
426	3/101	2	2	3	5.97566
427	CP57-614	2	2	3	6.12706
428	8/12	2	2	3	5.452
429	7/12	2	2	3	4.93636
430	3/62	2	2	3	4.91786
431	6/31	2	2	3	5.51716
432	6/28	2	2	3	4.80859
433	4/6	2	2	3	5.58567
434	6/60	2	2	3	5.18016
435	4/1	2	2	3	5.03111
436	3/87	2	2	3	5.09427
437	6/8	2	2	3	5.46069
438	1/66	2	2	3	5.46974
439	4/5	2	2	3	5.01658
440	8/29	2	2	3	5.65914
441	3/3	2	2	3	5.28095
442	1/93	2	2	3	5.27644
443	NCO310	2	2	3	5.207
444	6/33	2	2	3	6.0153
445	6/39	2	2	3	5.82956
446	8/10	2	2	3	5.06752
447	1/90	2	2	3	5.72151
448	CP48-103	2	2	3	5.0906
449	1/9	2	2	3	5.08149
450	1/26	2	2	3	5.62383
451	3/87	2	3	1	8.56692
452	6/8	2	3	1	8.1418
453	1/66	2	3	1	6.16211
454	4/5	2	3	1	6.85383
455	8/29	2	3	1	8.41991
456	3/3	2	3	1	6.86634
457	1/93	2	3	1	9.11621
458	NCO310	2	3	1	10.12
459	6/33	2	3	1	8.15003
460	8/23	2	3	1	6.66965
461	6/31	2	3	1	11.4376
462	6/28	2	3	1	6.89849
463	4/6	2	3	1	7.16793
464	6/60	2	3	1	11.2902
465	4/1	2	3	1	6.34542
466	8/10	2	3	1	9.34458
467	1/90	2	3	1	6.23852
468	6/39	2	3	1	6.25512
469	1/9	2	3	1	6.86292
470	1/26	2	3	1	6.94557
471	CP69-1062	2	3	1	6.5377
472	CP48-103	2	3	1	7.57842
473	6/26	2	3	1	9.0423
474	6/12	2	3	1	10.0962
475	1/113	2	3	1	7.76008
476	3/101	2	3	1	6.99811
477	CP57-614	2	3	1	6.94069
478	8/12	2	3	1	6.90502
479	7/12	2	3	1	9.36639
480	3/62	2	3	1	7.89519
481	8/12	2	3	2	8.10766
482	NCO310	2	3	2	9.59175
483	6/26	2	3	2	8.35892
484	8/10	2	3	2	6.16393
485	6/12	2	3	2	7.43217
486	8/23	2	3	2	7.65623
487	4/1	2	3	2	8.62183
488	3/87	2	3	2	7.92914
489	1/90	2	3	2	6.7676
490	4/6	2	3	2	7.48111
491	3/3	2	3	2	7.43033
492	4/5	2	3	2	6.56865
493	1/93	2	3	2	9.62398
494	3/62	2	3	2	6.57925
495	1/113	2	3	2	6.52525
496	CP48-103	2	3	2	7.64265
497	7/12	2	3	2	9.4624
498	CP57-614	2	3	2	7.05524
499	1/66	2	3	2	7.83607
500	1/26	2	3	2	6.45269
501	6/39	2	3	2	7.11082
502	CP69-1062	2	3	2	7.30264
503	6/33	2	3	2	7.31698
504	6/31	2	3	2	10.3579
505	6/60	2	3	2	6.63652
506	6/8	2	3	2	6.28196
507	3/101	2	3	2	7.07191
508	1/9	2	3	2	5.82667
509	8/29	2	3	2	6.78721
510	6/28	2	3	2	5.83341
511	NCO310	2	3	3	6.36475
512	7/12	2	3	3	7.53008
513	6/12	2	3	3	6.40637
514	8/29	2	3	3	6.89151
515	6/31	2	3	3	6.89066
516	6/26	2	3	3	6.53286
517	8/23	2	3	3	6.73631
518	3/3	2	3	3	6.93046
519	1/93	2	3	3	9.26015
520	6/28	2	3	3	6.44125
521	3/101	2	3	3	8.51356
522	6/60	2	3	3	6.75503
523	8/10	2	3	3	7.27918
524	1/90	2	3	3	8.14027
525	1/113	2	3	3	6.67664
526	6/33	2	3	3	6.49684
527	CP69-1062	2	3	3	8.1233
528	6/39	2	3	3	8.32495
529	1/26	2	3	3	6.62013
530	CP48-103	2	3	3	6.80521
531	4/1	2	3	3	7.36714
532	3/87	2	3	3	11.1539
533	1/9	2	3	3	6.05518
534	3/62	2	3	3	7.16646
535	8/12	2	3	3	5.87605
536	1/66	2	3	3	6.17305
537	6/8	2	3	3	10.9648
538	4/5	2	3	3	8.04735
539	CP57-614	2	3	3	7.89605
540	4/6	2	3	3	7.17488
541	4/1	3	1	1	6.72782
542	3/87	3	1	1	6.02537
543	1/113	3	1	1	6.27789
544	3/62	3	1	1	7.05572
545	8/12	3	1	1	7.56524
546	1/66	3	1	1	5.7283
547	6/8	3	1	1	7.31592
548	4/5	3	1	1	5.89851
549	CP57-614	3	1	1	5.84543
550	4/6	3	1	1	5.99531
551	3/101	3	1	1	6.68454
552	6/60	3	1	1	6.25444
553	8/10	3	1	1	5.83641
554	1/90	3	1	1	5.67913
555	1/9	3	1	1	5.98678
556	6/33	3	1	1	7.44658
557	CP69-1062	3	1	1	7.23412
558	6/39	3	1	1	5.87119
559	1/26	3	1	1	5.10594
560	CP48-103	3	1	1	5.29479
561	NCO310	3	1	1	5.52756
562	7/12	3	1	1	6.13601
563	6/12	3	1	1	5.59514
564	8/29	3	1	1	10.8794
565	6/31	3	1	1	6.16176
566	6/26	3	1	1	13.9341
567	8/23	3	1	1	5.15527
568	3/3	3	1	1	5.55134
569	1/93	3	1	1	5.8318
570	6/28	3	1	1	5.80593
571	6/39	3	1	2	6.14004
572	1/93	3	1	2	6.06844
573	8/29	3	1	2	6.14502
574	6/31	3	1	2	6.35217
575	6/60	3	1	2	6.19879
576	6/8	3	1	2	6.9571
577	3/101	3	1	2	5.64753
578	1/9	3	1	2	5.93776
579	1/26	3	1	2	5.90635
580	6/28	3	1	2	5.49376
581	3/3	3	1	2	5.4837
582	4/5	3	1	2	5.01002
583	CP69-1062	3	1	2	5.50271
584	3/62	3	1	2	6.02946
585	1/113	3	1	2	5.66996
586	8/12	3	1	2	6.83824
587	NCO310	3	1	2	5.76904
588	6/26	3	1	2	6.72204
589	8/10	3	1	2	6.16134
590	6/12	3	1	2	5.47419
591	8/23	3	1	2	5.4673
592	4/1	3	1	2	5.36611
593	3/87	3	1	2	6.05723
594	1/90	3	1	2	5.78562
595	4/6	3	1	2	5.85855
596	CP48-103	3	1	2	6.00611
597	7/12	3	1	2	5.77703
598	CP57-614	3	1	2	5.08663
599	1/66	3	1	2	9.22502
600	6/33	3	1	2	6.11371
601	CP69-1062	3	1	3	5.85606
602	8/23	3	1	3	7.12671
603	6/26	3	1	3	5.62326
604	6/12	3	1	3	6.87068
605	1/113	3	1	3	6.00894
606	3/101	3	1	3	7.30642
607	CP57-614	3	1	3	5.78955
608	8/12	3	1	3	5.515
609	7/12	3	1	3	5.54569
610	3/62	3	1	3	5.5004
611	6/31	3	1	3	5.60631
612	6/28	3	1	3	5.51412
613	4/6	3	1	3	5.46075
614	6/60	3	1	3	5.30337
615	4/1	3	1	3	5.53375
616	3/87	3	1	3	6.22829
617	6/8	3	1	3	5.89566
618	1/66	3	1	3	4.98156
619	4/5	3	1	3	5.69991
620	8/29	3	1	3	5.24295
621	3/3	3	1	3	5.64428
622	1/93	3	1	3	5.57309
623	NCO310	3	1	3	4.45744
624	6/33	3	1	3	6.00042
625	6/39	3	1	3	4.97392
626	8/10	3	1	3	6.06531
627	1/90	3	1	3	5.70212
628	CP48-103	3	1	3	6.73189
629	1/9	3	1	3	5.50827
630	1/26	3	1	3	5.7768
631	4/1	3	2	1	8.98798
632	3/87	3	2	1	10.9746
633	1/113	3	2	1	10.7857
634	3/62	3	2	1	7.48337
635	8/12	3	2	1	9.33494
636	1/66	3	2	1	11.3763
637	6/8	3	2	1	8.8552
638	4/5	3	2	1	9.20868
639	CP57-614	3	2	1	9.16608
640	4/6	3	2	1	10.0515
641	3/101	3	2	1	8.72705
642	6/60	3	2	1	8.58146
643	8/10	3	2	1	9.00515
644	1/90	3	2	1	8.64436
645	1/9	3	2	1	8.11393
646	6/33	3	2	1	8.32155
647	CP69-1062	3	2	1	9.698
648	6/39	3	2	1	8.75342
649	1/26	3	2	1	7.75941
650	CP48-103	3	2	1	8.83379
651	NCO310	3	2	1	7.91227
652	7/12	3	2	1	11.0474
653	6/12	3	2	1	7.48475
654	8/29	3	2	1	9.9749
655	6/31	3	2	1	7.47298
656	6/26	3	2	1	9.50671
657	8/23	3	2	1	8.12938
658	3/3	3	2	1	6.7918
659	1/93	3	2	1	8.39906
660	6/28	3	2	1	7.15609
661	6/39	3	2	2	10.4588
662	1/93	3	2	2	10.1573
663	8/29	3	2	2	9.11216
664	6/31	3	2	2	10.0025
665	6/60	3	2	2	9.49384
666	6/8	3	2	2	10.2643
667	3/101	3	2	2	10.3478
668	1/9	3	2	2	10.3408
669	1/26	3	2	2	9.83018
670	6/28	3	2	2	8.50771
671	3/3	3	2	2	7.91308
672	4/5	3	2	2	7.68242
673	CP69-1062	3	2	2	9.84316
674	3/62	3	2	2	8.27074
675	1/113	3	2	2	10.4565
676	8/12	3	2	2	8.92746
677	NCO310	3	2	2	10.1151
678	6/26	3	2	2	10.1779
679	8/10	3	2	2	8.73337
680	6/12	3	2	2	10.048
681	8/23	3	2	2	10.786
682	4/1	3	2	2	8.59272
683	3/87	3	2	2	10.0093
684	1/90	3	2	2	8.29915
685	4/6	3	2	2	9.71742
686	CP48-103	3	2	2	8.07864
687	7/12	3	2	2	10.0504
688	CP57-614	3	2	2	9.98712
689	1/66	3	2	2	10.2825
690	6/33	3	2	2	8.18216
691	CP69-1062	3	2	3	9.72648
692	8/23	3	2	3	7.67678
693	6/26	3	2	3	10.0763
694	6/12	3	2	3	8.28607
695	1/113	3	2	3	7.66024
696	3/101	3	2	3	8.82488
697	CP57-614	3	2	3	8.35648
698	8/12	3	2	3	8.02598
699	7/12	3	2	3	9.91945
700	3/62	3	2	3	9.65874
701	6/31	3	2	3	8.6062
702	6/28	3	2	3	7.78379
703	4/6	3	2	3	8.80074
704	6/60	3	2	3	8.1084
705	4/1	3	2	3	8.23246
706	3/87	3	2	3	8.75324
707	6/8	3	2	3	9.21275
708	1/66	3	2	3	8.0783
709	4/5	3	2	3	7.87203
710	8/29	3	2	3	7.49339
711	3/3	3	2	3	8.04585
712	1/93	3	2	3	7.70291
713	NCO310	3	2	3	8.15587
714	6/33	3	2	3	8.43199
715	6/39	3	2	3	10.0395
716	8/10	3	2	3	7.81572
717	1/90	3	2	3	7.51593
718	CP48-103	3	2	3	8.65331
719	1/9	3	2	3	7.57278
720	1/26	3	2	3	9.08136
721	3/87	3	3	1	10.0428
722	6/8	3	3	1	8.44942
723	1/66	3	3	1	10.0486
724	4/5	3	3	1	10.2268
725	8/29	3	3	1	9.89304
726	3/3	3	3	1	8.94575
727	1/93	3	3	1	11.8304
728	NCO310	3	3	1	6.8893
729	6/33	3	3	1	10.6487
730	8/23	3	3	1	9.35198
731	6/31	3	3	1	10.3476
732	6/28	3	3	1	8.33524
733	4/6	3	3	1	9.16997
734	6/60	3	3	1	8.38419
735	4/1	3	3	1	9.28731
736	8/10	3	3	1	8.23842
737	1/90	3	3	1	9.73747
738	6/39	3	3	1	9.88598
739	1/9	3	3	1	9.76332
740	1/26	3	3	1	9.07009
741	CP69-1062	3	3	1	12.1526
742	CP48-103	3	3	1	9.14373
743	6/26	3	3	1	8.56086
744	6/12	3	3	1	7.80234
745	1/113	3	3	1	8.75661
746	3/101	3	3	1	9.13152
747	CP57-614	3	3	1	8.51685
748	8/12	3	3	1	7.2443
749	7/12	3	3	1	9.68896
750	3/62	3	3	1	10.1142
751	8/12	3	3	2	8.02716
752	NCO310	3	3	2	7.49838
753	6/26	3	3	2	7.28458
754	8/10	3	3	2	8.58078
755	6/12	3	3	2	7.89594
756	8/23	3	3	2	8.0067
757	4/1	3	3	2	9.11845
758	3/87	3	3	2	7.07528
759	1/90	3	3	2	6.55495
760	4/6	3	3	2	7.98248
761	3/3	3	3	2	8.67415
762	4/5	3	3	2	7.27375
763	1/93	3	3	2	10.8367
764	3/62	3	3	2	7.3899
765	1/113	3	3	2	6.84105
766	CP48-103	3	3	2	6.79389
767	7/12	3	3	2	7.47817
768	CP57-614	3	3	2	7.10257
769	1/66	3	3	2	7.98188
770	1/26	3	3	2	8.97798
771	6/39	3	3	2	9.85703
772	CP69-1062	3	3	2	10.0933
773	6/33	3	3	2	8.63444
774	6/31	3	3	2	9.61408
775	6/60	3	3	2	8.49634
776	6/8	3	3	2	7.22926
777	3/101	3	3	2	7.10441
778	1/9	3	3	2	8.61007
779	8/29	3	3	2	8.6827
780	6/28	3	3	2	8.22271
781	NCO310	3	3	3	10.1513
782	7/12	3	3	3	10.2562
783	6/12	3	3	3	10.6867
784	8/29	3	3	3	8.0394
785	6/31	3	3	3	7.38198
786	6/26	3	3	3	10.6843
787	8/23	3	3	3	9.31054
788	3/3	3	3	3	7.1526
789	1/93	3	3	3	8.60692
790	6/28	3	3	3	7.43299
791	3/101	3	3	3	9.57048
792	6/60	3	3	3	8.71282
793	8/10	3	3	3	9.42338
794	1/90	3	3	3	8.48306
795	1/113	3	3	3	9.73107
796	6/33	3	3	3	8.03286
797	CP69-1062	3	3	3	8.57918
798	6/39	3	3	3	7.42494
799	1/26	3	3	3	9.78508
800	CP48-103	3	3	3	8.92389
801	4/1	3	3	3	7.35456
802	3/87	3	3	3	8.64026
803	1/9	3	3	3	8.11268
804	3/62	3	3	3	11.5809
805	8/12	3	3	3	8.51912
806	1/66	3	3	3	8.23099
807	6/8	3	3	3	9.93586
808	4/5	3	3	3	7.4539
809	CP57-614	3	3	3	8.82718
810	4/6	3	3	3	9.88722
