# Supplementary material for: The Stability of Sugar Yield in Promising Sugarcane Genotypes (Saccharum officinarum L.)
Source: Hindawi journal article supplement (doi:10.1155/2024/5540112), 2024-01-18
Supplement: f1 [file 5540112.f1.zip › S3.xlsx]

## Sheet: 1
genotype	Average yield in place 1	Average yield in place 2	Average yield in place 3	total average	Rank in place 1	Rank in place 2	Rank in place 3	average rank	Standard deviation of yield ranks	yield index ratio
g1	7.98051	6.90454	8.02089	7.63531	27	16	13	18.6667	7.37111	97.6097
g2	8.28434	6.75549	7.92147	7.65376	18	18	16	17.3333	1.1547	97.8455
g3	8.27671	6.36142	8.43705	7.69173	19	27	3	16.3333	12.2202	100.083
g4	7.82343	6.29328	7.77183	7.29618	29	28	20	25.6667	4.93288	93.2742
g5	8.46411	6.62938	7.37798	7.49049	16	22	27	21.6667	5.50757	95.7582
g6	9.36665	7.66255	8.33407	8.45442	1	3	6	3.33333	2.51661	108.081
g7	9.11601	7.32259	8.14941	8.196	4	9	10	7.66667	3.21455	104.777
g8	8.65465	6.20811	7.13362	7.33213	13	30	30	24.3333	9.81495	93.7337
g9	8.11251	6.57622	8.12037	7.60303	23	26	11	20	7.93725	97.197
g10	8.54369	7.80622	8.20072	8.18354	15	2	8	8.33333	6.50641	104.618
g11	8.70772	6.71879	7.68902	7.70518	11	21	23	18.3333	6.4291	98.5028
g12	8.25983	6.62712	7.36956	7.41883	20	23	28	23.6667	4.04145	94.8422
g13	8.37906	6.62485	8.10266	7.70219	17	24	12	17.6667	6.02771	98.4646
g14	9.22568	7.31395	7.79376	8.11113	3	11	18	10.6667	7.50555	103.693
g15	9.0082	7.39767	9.17445	8.52677	7	8	1	5.33333	3.78594	109.006
g16	8.05599	6.27928	7.13915	7.15814	24	29	29	27.3333	2.88675	91.5095
g17	9.10869	7.812	7.94951	8.29006	5	1	15	7	7.2111	105.98
g18	8.18477	7.03194	7.97916	7.73196	21	15	14	16.6667	3.78594	98.8452
g19	8.8461	7.04429	8.15608	8.01549	8	14	9	10.3333	3.21455	102.47
g20	8.01928	7.51697	7.72596	7.75407	25	6	22	17.6667	10.2144	99.1279
g21	9.02651	7.66234	8.23505	8.30796	6	4	7	5.66667	1.52753	106.209
g22	9.27243	7.29501	8.43326	8.33356	2	12	4	6	5.2915	106.536
g23	8.80888	6.80625	7.76221	7.79245	9	17	21	15.6667	6.1101	99.6185
g24	8.00919	7.1154	7.77749	7.63403	26	13	19	19.3333	6.50641	97.5933
g25	7.74731	6.74099	7.89008	7.45946	30	20	17	22.3333	6.80686	95.3616
g26	8.67724	6.74836	8.38478	7.93679	12	19	5	12	7	101.464
g27	7.97642	6.59999	7.60667	7.39436	28	25	25	26	1.73205	94.5293
g28	8.76134	7.48033	7.63088	7.95752	10	7	24	13.6667	9.07377	101.729
g29	8.59106	7.31654	8.74284	8.21681	14	10	2	8.66667	6.1101	105.044
g30	8.12114	7.54874	7.38625	7.68538	22	5	26	17.6667	11.1505	98.2497
				7.82229

## Sheet: 2
genotype	Average yield	( CVi )	( Si 2 )	( wi 2 )	( Ϭi 2 )	( bi )	( S2di )	( Ri 2 )
		Coefficient of variation	Environmental variance	ecovalence	Stability variance	The regression coefficient	Deviation from the regression line	Detection coefficient
1/113	7.63531	14.5698	1.23323	15.4615	1.76274	-0.056512	0.00319361	0.000627131
1/26	7.65376	17.765	1.79965	19.7539	2.34673	0.135192	0.0182768	0.00245941
1/66	7.69173	17.0324	1.68347	17.0151	2.02069	0.533947	0.2851	0.0410121
1/9	7.29618	16.9345	1.52668	18.7472	2.22689	-0.203433	0.041385	0.0065647
1/90	7.49049	16.7621	1.57654	15.8053	1.87666	0.491278	0.241354	0.037074
1/93	8.45442	19.7446	2.83043	23.9993	2.85214	2.1612	4.67077	0.399627
3/101	8.196	15.1167	1.535	13.7122	1.62749	1.25575	1.57691	0.248781
3/3	7.33213	21.1185	2.4016	23.5178	2.79482	0.234288	0.0548907	0.005535
3/62	7.60303	18.3321	1.87353	17.4357	2.07075	0.807639	0.652281	0.0843129
3/87	8.18354	15.4101	1.5774	14.6828	1.74303	1.15823	1.3415	0.205953
4/1	7.70518	17.0384	1.72356	15.9906	1.89872	0.824708	0.680143	0.095564
4/5	7.41883	18.3393	1.85097	20.2768	2.40898	0.134357	0.0180518	0.00236179
4/6	7.70219	18.7436	2.0844	18.542	2.20246	1.01117	1.02246	0.118792
6/12	8.11113	15.2281	1.48325	12.9527	1.53707	0.84843	0.719833	0.117527
6/26	8.52677	16.9067	2.09243	16.082	1.9096	2.32612	5.41083	0.626228
6/28	7.15814	18.6834	1.74903	22.9172	2.72332	-0.61625	0.379764	0.0525818
6/31	8.29006	15.8086	1.68481	12.5787	1.49254	1.75162	3.06818	0.441011
6/33	7.73196	15.189	1.35774	14.8663	1.76488	0.743542	0.552854	0.0986083
6/39	8.01549	19.7664	2.61174	20.6809	2.45709	1.77837	3.1626	0.293247
6/60	7.75407	13.7323	1.17757	12.515	1.48496	0.55583	0.308947	0.0635356
6/8	8.30796	16.1756	1.73603	12.6674	1.5031	1.82738	3.33931	0.46582
7/12	8.33356	18.7235	2.36597	21.8734	2.59905	1.30879	1.71293	0.175327
8/10	7.79245	16.282	1.58392	14.623	1.73592	0.909531	0.827246	0.12648
8/12	7.63403	12.8262	0.988506	12.207	1.44829	0.184534	0.0340527	0.00834242
8/23	7.45946	15.4664	1.31609	16.4776	1.9567	-0.0646982	0.00418586	0.000770226
8/29	7.93679	14.2859	1.22539	12.281	1.4571	0.88259	0.778964	0.153944
cp48-103	7.39436	14.7932	1.18174	15.5593	1.84737	-0.127135	0.0161633	0.00324191
cp57-614	7.95752	18.3019	2.12907	18.6246	2.2123	1.2782	1.6338	0.185835
cp69-1062	8.21681	18.4156	2.30761	20.7484	2.46513	1.3629	1.85751	0.194934
Nco310	7.68538	14.9106	1.33304	13.557	1.60901	0.578473	0.334631	0.0607913

## Sheet: 3
Genotype name	Average yield (t/h)	ecovalence	Shukla stability variance	regression coefficient	square of deviation from linear regression
g1	7.635	3.18	0.41	0.82	2.74
g2	7.654	3.38	0.44	1.03	4.38
g3	7.692	3.07	0.4	1	4.01
g4	7.296	1.73	0.22	0.92	2.54
g5	7.49	1.69	0.21	0.97	2.67
g6	8.454	6.85	0.9	1.28	7.26
g7	8.196	1.89	0.24	1.04	2.91
g8	7.332	4.61	0.6	1.08	5.66
g9	7.603	3.14	0.41	1.05	4.19
g10	8.184	4.06	0.53	0.89	4.76
g11	7.705	3.62	0.47	1	4.63
g12	7.419	1.31	0.16	1.07	2.34
g13	7.702	2.53	0.32	1.17	3.29
g14	8.111	3.18	0.41	0.99	4.21
g15	8.527	6.43	0.85	0.92	7.24
g16	7.158	1.16	0.14	0.94	2.08
g17	8.29	3.46	0.45	1	4.51
g18	7.732	2.39	0.31	0.91	3.21
g19	8.015	3.9	0.51	1.34	3.79
g20	7.754	3.65	0.47	0.75	3.01
g21	8.308	1.9	0.24	1.07	2.92
g22	8.334	4.59	0.6	1.22	5.15
g23	7.792	0.8	0.09	1.09	1.82
g24	7.634	3.15	0.41	0.73	3
g25	7.459	2.14	0.27	0.88	2.81
g26	7.937	2.58	0.33	0.88	3.29
g27 (CP48-103)	7.394	0.75	0.09	0.86	1.38
g28 (CP57-614)	7.958	4.63	0.61	1.13	5.56
g29 (CP69-1062)	8.217	4.19	0.55	1.15	5.04
g30 (NCo310)	7.685	4.26	0.56	0.82	4.68

## Sheet: 4
genotype	code	yield average	rank	yield correction factor	Corrected rating	Stability variance	Stability rank	Simultaneous selection criterion
G16	6/28	7.15814	16	-8	8	0.41	0	8
G4	1/9	7.29618	4	-7	-3	0.44	0	-3
G8	3/3	7.33213	8	-6	2	0.4	0	2
G27	CP48-103	7.39436	27	-6	21	0.22	0	21
G12	4/5	7.41883	12	-5	7	0.21	0	7
G25	8/23	7.45946	25	-4	21	0.9	-8	13
G5	1/90	7.49049	5	-3	2	0.24	0	2
G9	3/62	7.60303	9	-2	7	0.6	-4	3
G24	8/12	7.63403	24	-1	23	0.41	0	23
G1	1/113	7.63531	1	-1	0	0.53	0	0
G2	1/26	7.65376	2	-1	1	0.47	0	1
G30	NCO310	7.68538	30	-1	29	0.16	0	29
G3	1/66	7.69173	3	-1	2	0.32	0	2
G13	4/6	7.70219	13	-1	12	0.41	0	12
G11	4/1	7.70518	11	-1	10	0.85	-8	2
G18	6/33	7.73196	18	-1	17	0.14	0	17
G20	6/60	7.75407	20	-1	19	0.45	0	19
G23	8/10	7.79245	23	-1	22	0.31	0	22
G26	8/29	7.93679	26	1	27	0.51	0	27
G28	CP57-614	7.95752	28	1	29	0.47	0	29
G19	6/39	8.01549	19	1	20	0.24	0	20
G14	6/12	8.11113	14	1	15	0.6	-4	11
G10	3/87	8.18354	10	1	11	0.09	0	11
G7	3/101	8.196	7	1	8	0.41	0	8
G29	CP69-1062	8.21681	29	1	30	0.27	0	30
G17	6/31	8.29006	17	1	18	0.33	0	18
G21	6/8	8.30796	21	1	22	0.09	0	22
G22	7/12	8.33356	22	1	23	0.61	-4	19
G6	1/93	8.45442	6	1	7	0.55	0	7
G15	6/26	8.52677	15	1	16	0.56	0	16

## Sheet: 5
Source	DF	SS	M S	F Value	Pr > F	%TSS	%GE
REP	2	16.68	8.34	7.23	0.0008**	1.1
GEN	29	107.48	3.71	3.21	0.0001**	7.1
ENV	8	1108.17	138.52	120.13	0.0001**	73.4
ENV*GEN	232	276.44	1.19	1.03	0.38ns	18.3
IPC1	36	73.39	2.04	1.77	0.004**		26.6
G * E Residual	215	202.66	6.88624
Total	522	1858.21	162.72

## Sheet: 6
DFAMMI	MSAMMI	PORCENT	PORCENAC	F_AMMI	PROBF
36	2.03866	26.5862	26.586	1.76803	0.00449
34	1.545	19.029	45.615	1.3399	0.09804
32	1.33964	15.5291	61.144	1.1618	0.25116
30	1.14947	12.4918	73.636	0.99687	0.47311
28	0.92435	9.3757	83.012	0.80164	0.75679
26	0.80991	7.6281	90.64	0.70239	0.86241
24	0.62266	5.4134	96.053	0.54	0.96501
22	0.49521	3.9466	100	0.42947	0.99002
20	0	0	100	0	1

## Sheet: 7
Genotype	Average yield	PC1	PC2	bi	s2di	w2i	cv
G1	7.64	-0.51	-0.31	1.76	0	15.46	14.57
G2	7.65	-0.56	-0.1	2.35	0.02	19.75	17.76
G3	7.69	-0.14	0.4	2.02	0.29	17.02	17.03
G4	7.3	-0.24	0.33	2.23	0.04	18.75	16.93
G5	7.49	0.39	0.2	1.88	0.24	15.81	16.76
G6	8.45	1.08	-0.13	2.85	4.67	24	19.74
G7	8.2	-0.3	-0.33	1.63	1.58	13.71	15.12
G8	7.33	0.75	0.19	2.79	0.05	23.52	21.12
G9	7.6	0.29	0.71	2.07	0.65	17.44	18.33
G10	8.18	0.33	-0.59	1.74	1.34	14.68	15.41
G11	7.71	-0.11	0.39	1.9	0.68	15.99	17.04
G12	7.42	-0.23	0.04	2.41	0.02	20.28	18.34
G13	7.7	0.3	0.55	2.2	1.02	18.54	18.74
G14	8.11	0.01	-0.68	1.54	0.72	12.95	15.23
G15	8.53	-0.49	0.56	1.91	5.41	16.08	16.91
G16	7.16	-0.14	-0.2	2.72	0.38	22.92	18.68
G17	8.29	0.59	-0.25	1.49	3.07	12.58	15.81
G18	7.73	-0.39	0.31	1.76	0.55	14.87	15.19
G19	8.02	0.33	0.44	2.46	3.16	20.68	19.77
G20	7.9	-0.05	-0.63	1.48	0.31	12.51	13.73
G21	8.41	-0.29	-0.26	1.5	3.34	12.67	16.18
G22	8.22	0.45	-0.37	2.6	1.71	21.87	18.72
G23	7.73	0.23	0.26	1.74	0.83	14.62	16.28
G24	7.66	-0.53	-0.32	1.45	0.03	12.21	12.83
G25	7.55	-0.62	-0.04	1.96	0	16.48	15.47
G26	7.84	-0.28	0.44	1.46	0.78	12.28	14.29
G27	7.34	-0.1	0.09	1.85	0.02	15.56	14.79
G28	7.97	0.07	-0.31	2.21	1.63	18.62	18.3
G29	8.26	0.06	-0.13	2.47	1.86	20.75	18.42
G30	7.69	0.1	-0.24	1.61	0.33	13.56	14.91
محیط	میانگین عملکرد محیطی	Pc1	Pc2
E1	9.18	0.49	1.22
E2	8	-0.94	-0.74
E3	8.39	1.27	-0.53
E4	7.84	-0.75	-0.66
E5	5.6	-0.06	-0.06
E6	7.58	0.87	-0.69
E7	6.11	-0.82	0.78
E8	8.95	-0.35	0.11
E9	8.78	0.29	0.59
