# Supplementary material for: The Stability of Sugar Yield in Promising Sugarcane Genotypes (Saccharum officinarum L.)
Source: Hindawi journal article supplement (doi:10.1155/2024/5540112), 2024-01-18
Supplement: f1 [file 5540112.f1.zip › S4.xlsx]

## Sheet: Sheet1
Genotype	Average yield	PC1	PC2	bi	s2di	w2i	cv
G14	8.11259	0.01109	0.67594	0.84843	0.719833	12.9527	15.2281
G20	7.90222	0.04583	0.63066	0.55583	0.308947	12.515	13.7323
G29	8.25778	0.05907	0.13425	1.3629	1.85751	20.7484	18.4156
G28	7.97259	0.06962	0.30576	1.2782	1.6338	18.6246	18.3019
G30	7.6863	0.09949	0.24256	0.578473	0.334631	13.557	14.9106
G27	7.34259	0.10112	0.09454	0.127135	0.0161633	15.5593	14.7932
G11	7.70519	0.10891	0.39486	0.824708	0.680143	15.9906	17.0384
G3	7.69185	0.14077	0.39805	0.533947	0.2851	17.0151	17.0324
G16	7.15815	0.14089	0.1971	0.61625	0.379764	22.9172	18.6834
G23	7.72963	0.22607	0.25629	0.909531	0.827246	14.623	16.282
G12	7.41852	0.23077	0.04045	0.134357	0.0180518	20.2768	18.3393
G4	7.2963	0.23742	0.32538	0.203433	0.041385	18.7472	16.9345
G26	7.84444	0.27601	0.43714	0.88259	0.778964	12.281	14.2859
G21	8.40926	0.28543	0.2626	1.82738	3.33931	12.6674	16.1756
G9	7.6037	0.28552	0.70577	0.807639	0.652281	17.4357	18.3321
G13	7.70259	0.30123	0.54801	1.01117	1.02246	18.542	18.7436
G7	8.19593	0.30276	0.3315	1.25575	1.57691	13.7122	15.1167
G19	8.01556	0.32505	0.44148	1.77837	3.1626	20.6809	19.7664
G10	8.18333	0.33364	0.59405	1.15823	1.3415	14.6828	15.4101
G5	7.49074	0.38706	0.19661	0.491278	0.241354	15.8053	16.7621
G18	7.73111	0.39184	0.31087	0.743542	0.552854	14.8663	15.189
G22	8.21556	0.4528	0.37215	1.30879	1.71293	21.8734	18.7235
G15	8.5263	0.4939	0.55641	2.32612	5.41083	16.082	16.9067
G1	7.63593	0.51294	0.30575	0.056512	0.00319361	15.4615	14.5698
G24	7.66222	0.52699	0.31965	0.184534	0.0340527	12.207	12.8262
G2	7.65481	0.55964	0.09874	0.135192	0.0182768	19.7539	17.765
G17	8.29037	0.5939	0.2543	1.75162	3.06818	12.5787	15.8086
G25	7.55111	0.61743	0.04493	0.0646982	0.00418586	16.4776	15.4664
G8	7.33185	0.75067	0.19089	0.234288	0.0548907	23.5178	21.1185
G6	8.45444	1.07743	0.12683	2.1612	4.67077	23.9993	19.7446

## Sheet: Sheet2
			NAME	M	1	2	3	M1					M	1	2	3	M1
			8/23	7.55111	-0.61743	-0.04493	-0.50183	-0.388063			ENV	S1	9.17656	0.49249	1.2158	-0.08228	0.542003
			NCO310	7.6863	0.09949	-0.24256	-0.82738	-0.323483			ENV	S2	8.00289	-0.93543	-0.74079	-0.62993	-0.768717
			1/113	7.63593	-0.51294	-0.30575	-0.13456	-0.31775			ENV	S3	8.39056	1.27403	-0.52953	1.01627	0.586923
			1/26	7.65481	-0.55964	-0.09874	-0.25409	-0.304157			ENV	S4	7.83911	-0.74576	-0.65927	0.95076	-0.151423
			6/60	7.90222	-0.04583	-0.63066	-0.04133	-0.239273			ENV	S5	5.60022	-0.06496	-0.06381	-0.69986	-0.27621
			6/12	8.11259	0.01109	-0.67594	0.02795	-0.2123			ENV	S6	7.58256	0.8704	-0.69201	-0.84607	-0.22256
			6/8	8.40926	-0.28543	-0.2626	0.0746	-0.15781			ENV	S7	6.10856	-0.82426	0.77817	0.38275	0.11222
			4/1	7.70519	-0.10891	0.39486	-0.7079	-0.14065			ENV	S8	8.94867	-0.35403	0.10595	0.15848	-0.0298667
			3/87	8.18333	0.33364	-0.59405	-0.1533	-0.137903			ENV	S9	8.78278	0.28752	0.58548	-0.25011	0.20763
			8/12	7.66222	-0.52699	-0.31965	0.4495	-0.13238
			4/5	7.41852	-0.23077	0.04045	-0.18198	-0.1241
			3/101	8.19593	-0.30276	-0.3315	0.38221	-0.0840167
			CP48-103	7.34259	-0.10112	0.09454	-0.24286	-0.0831467
			6/33	7.73111	-0.39184	0.31087	-0.13278	-0.07125
			6/31	8.29037	0.5939	-0.2543	-0.45697	-0.0391233
			6/28	7.15815	-0.14089	-0.1971	0.27258	-0.0218033
			1/9	7.2963	-0.23742	0.32538	-0.11661	-0.00955
			7/12	8.21556	0.4528	-0.37215	-0.06536	0.00509667
			8/29	7.84444	-0.27601	0.43714	0.05854	0.0732233
			1/66	7.69185	-0.14077	0.39805	0.10772	0.121667
			8/10	7.72963	0.22607	0.25629	-0.04121	0.14705
			CP69-106	8.25778	0.05907	-0.13425	0.53472	0.15318
			CP57-614	7.97259	0.06962	-0.30576	0.76416	0.176007
			6/26	8.5263	-0.4939	0.55641	0.55261	0.20504
			1/90	7.49074	0.38706	0.19661	0.13182	0.238497
			4/6	7.70259	0.30123	0.54801	-0.08269	0.255517
			3/62	7.6037	0.28552	0.70577	-0.09757	0.297907
			1/93	8.45444	1.07743	-0.12683	0.03272	0.327773
			3/3	7.33185	0.75067	0.19089	0.19816	0.379907
			6/39	8.01556	0.32505	0.44148	0.45111	0.40588
