# Supplementary material for: The Stability of Sugar Yield in Promising Sugarcane Genotypes (Saccharum officinarum L.)
Source: Hindawi journal article supplement (doi:10.1155/2024/5540112), 2024-01-18
Supplement: f1 [file 5540112.f1.zip › S5.xlsx]

## Sheet: Sheet1
	yield in different places and years
genotype	1_1	1_2	1_3	2_1	2_2	2_3	3_1	3_2	3_3
1/113	7.86123	8.35769	7.7226	7.7398	5.98651	6.98732	5.9856	9.63416	8.44291
1/26	8.59468	8.8987	7.35963	8.00364	5.59002	6.67279	5.59636	8.89032	9.27772
1/66	8.85945	7.63997	8.33071	6.84902	5.5115	6.72374	6.64496	9.91236	8.75382
1/9	8.54024	7.47044	7.4596	6.98434	5.64724	6.24826	5.81094	8.67585	8.82869
1/90	9.41815	7.17461	8.79958	7.14206	5.69727	7.0488	5.72229	8.15315	8.25849
1/93	9.94267	7.77446	10.3828	7.9626	5.69162	9.33344	5.82444	8.75308	10.4247
3/101	9.28305	9.03017	9.0348	8.9499	5.49001	7.52786	6.54616	9.29992	8.60214
3/3	9.40064	7.11483	9.44848	6.43461	5.11402	7.07571	5.55977	7.58358	8.2575
3/62	9.58128	6.80151	7.95473	7.02993	5.4851	7.21363	6.19519	8.47095	9.69497
3/87	8.49075	7.93688	9.20346	7.96538	6.2366	9.21667	6.10363	9.91239	8.58613
4/1	10.1282	8.62971	7.36525	6.81412	5.89746	7.4448	5.87589	8.60439	8.58677
4/5	9.2846	8.17015	7.32474	7.75493	4.96981	7.15661	5.53615	8.25438	8.31815
4/6	9.83696	7.07786	8.22236	6.97411	5.62579	7.27464	5.77154	9.52322	9.01322
6/12	8.76751	9.45387	9.45565	8.26793	5.69568	7.97825	5.98001	8.60629	8.795
6/26	10.2919	8.19728	8.53541	8.97674	5.23825	7.97802	8.75979	9.9203	8.84326
6/28	8.19392	7.78172	8.19232	7.52486	4.92192	6.39105	5.6046	7.81586	7.99698
6/31	9.85856	8.33579	9.13171	7.78884	6.08509	9.56206	6.04008	8.69389	9.11455
6/33	9.41991	7.94944	7.18495	8.29156	5.48298	7.32128	6.52024	8.3119	9.10534
6/39	10.541	7.10521	8.89211	8.37309	5.52949	7.2303	5.66172	9.75056	9.05598
6/60	8.33885	7.0827	8.63628	8.44362	5.88005	8.22725	5.91887	8.7279	8.53112
6/8	10.0288	8.41564	8.63512	9.08715	5.43701	8.46286	6.72289	9.44408	8.53818
7/12	8.95497	9.32499	9.53732	7.52853	5.57019	8.78629	5.81958	10.3391	9.14112
8/10	9.76615	8.25826	8.40224	7.44858	5.37428	7.5959	6.02102	8.51808	8.74753
8/12	8.18414	7.69433	8.14911	8.79311	5.59019	6.96291	6.63949	8.76279	7.93019
8/23	8.42343	7.93833	6.88016	7.54871	5.65353	7.02073	5.91643	8.86406	8.88974
8/29	9.28981	8.75064	7.99127	7.5632	5.31568	7.36621	7.42247	8.86015	8.87172
CP48-103	8.53991	7.92106	7.46829	7.05961	5.39826	7.34209	6.01093	8.52191	8.28717
CP57-614	9.60599	7.45605	9.22198	9.52161	5.62205	7.29733	5.57387	9.16989	8.14887
CP69-1062	8.71613	7.5792	9.47785	8.84485	5.78356	7.32121	6.19763	9.75588	10.275
NCO310	9.15036	7.90111	7.31196	7.48133	6.47274	8.69217	5.25135	8.72774	8.17966
